# Supplementary material for: Force-Bioreactor for Assessing Pharmacological Therapies for Mechanobiological Targets
Source: Front Bioeng Biotechnol. 2022 Jul 19;10:907611. doi: 10.3389/fbioe.2022.907611 (PMC9343955; doi:10.3389/fbioe.2022.907611)
Supplement: Supplementary file 1 [file Table1.xlsx]

## Sheet: Bioreactor
Part	Material	Dimensions	Source	Product Number	Link	Note
Base Plate	Teflon	3/8” x 2” x 12”	McMaster-Carr	8735K34	https://www.mcmaster.com/catalog/128/4004	Machined to specifications in schematic
Stabilization Bar	Teflon	1/8” x 2” x 12”	McMaster-Carr	8735K11	https://www.mcmaster.com/catalog/128/4004	Machined to specifications in schematic
Screw	18-8 Stainless steel	4-40 x 1/2"	McMaster-Carr	92196A110	https://www.mcmaster.com/catalog/128/3421
Pins	18-8 Stainless steel	1/16" Diameter, 3/8" Long	McMaster-Carr	90145A417	https://www.mcmaster.com/catalog/128/3678
Washer	18-8 Stainless steel	0.04” thick, 0.375” diameter	McMaster-Carr	92141A009	https://www.mcmaster.com/catalog/128/3534
Spring	302 stainelss steel	0.5" Long, 0.18" OD, 0.144" ID	McMaster-Carr	9002T15	https://www.mcmaster.com/catalog/128/1425
Media Displacement Insert	Polysulfone	12” x 12” x 3/8”	McMaster-Carr	86735K11	https://www.mcmaster.com/catalog/128/4010	Machined to fit in pertri dish with base plate in the center
Glass Rod	Glass	1.5 mm diameter	McMaster-Carr	1357T114	https://www.mcmaster.com/catalog/128/4027	Full rod cut to length
Cantilever	Nitinol	0.008" diameter	Confluent Medical Technologies	WSE000800000SG	https://confluent-dev.myshopify.com/collections/all/condition_straight?page=2	Spooled wire cut to desired length
Petri Dish	Polystyrene	100 x 20 mm	Corning	353003	https://ecatalog.corning.com/life-sciences/b2c/US/en/Cell-Culture/Cell-Culture-Vessels/Dishes,-Culture/Falcon%C2%AE-Cell-Culture-Dishes/p/353003
					24

## Sheet: Imaging System
Part	Source	Product Number	Link
115 VAC Synchronous Timing Motor	Herbach and Rademan Company	H1-33 1RPH	https://www.herbachrademan.com/product-page/115-vac-synchronous-timing-motor-13
Raspberry Pi Computer	Raspberry Pi	Pi 3 Model B	https://www.raspberrypi.com/products/raspberry-pi-3-model-b/
Raspberry Pi Camera Module	Raspberry Pi	Module 2	https://www.raspberrypi.com/products/camera-module-v2/
Relay Switch	Digital Loggers, INC.	IOT2	https://dlidirect.com/products/iot-power-relay
Python Script	Custom	Custom	-
Cylindrical Platform	Machined from aluminum plate	Custom	-
